cantly greater in preeclampsia,<sup>12</sup> this is an important factor to consider, although it is pure conjecture at this point.

In conclusion, we have presented four cases in which preeclamptic patients were given LEA with local anesthetic solutions containing epinephrine. In no case was the hypertension enhanced. Previously, preeclamptic patients were felt to be at risk of a worsening of an already elevated blood pressure when given epinephrine in the epidural space.<sup>1-3,†</sup> However, the amount of epinephrine absorbed from the peridural space seems to have primarily a beta-adrenergic agonistic effect and does not worsen preexisting hypertension in preeclamptic patients.

#### REFERENCES

1. Gutsche B: Anesthetic considerations for preeclampsia-eclampsia, *Anesthesia for Obstetrics*. Edited by Shnider S, Levinson G. Baltimore, Williams and Wilkins, 1979, pp 224-234
2. Marx G, Hodgkinson R: Special considerations in complications of pregnancy, *Obstetric Analgesia and Anaesthesia*. Edited by Marx G, Bassel G. New York, Elsevier-North Holland-Biomedical Press, 1980, pp 296-334
3. Wright J: Anesthetic considerations in preeclampsia-eclampsia. *Anesth Analg* 62:590-601, 1983
4. Kennedy W, Sawyer TK, Gerbershagen HU, Cutler RE, Allen GD, Bonica JJ: Systemic cardiovascular and renal hemodynamic alterations during peridural anesthesia in normal man. *ANESTHESIOLOGY* 31:414-421, 1969
5. Bonica JJ, Akamatsu TJ, Berges PU, Morikawa K-I, Kennedy WF: Circulatory effects of peridural block. II. Effects of epinephrine. *ANESTHESIOLOGY* 34:514-522, 1971
6. Hood DD, Dewan DM, Rose JC, James FM: Maternal and fetal effects of intravenous epinephrine containing solutions in gravid ewes (abstract). *ANESTHESIOLOGY* 59:A393, 1983
7. Jouppila R, Jouppila P, Hollmen A, Koivula A: Epidural analgesia and placental blood flow during labor in pregnancies complicated by hypertension. *Br J Obstet Gynecol* 86:969-972, 1979
8. Jouppila P, Jouppila R, Hollmen A, Koivula A: Lumbar epidural analgesia to improve intervillous blood flow during labor in severe preeclampsia. *Obstet Gynecol* 59:158-161, 1982
9. Groenendijk R, Trimbos JBMJ, Wallenburg HCS: Hemodynamic measurements in preeclampsia: Preliminary observations. *Am J Obstet Gynecol* 150:232-236, 1984
10. Albright G, Jouppila R, Hollmen AI, Jouppila P, Vierola H, Koivula A: Epinephrine does not alter human intervillous blood flow during epidural anesthesia. *ANESTHESIOLOGY* 54:131-135, 1981
11. Jouppila R, Jouppila P, Hollmen A, Kuikka J: Effect of segmental extradural analgesia on placental blood flow during normal labor. *Br J Anaesth* 50:563-567, 1978
12. Pritchard J, MacDonald P, Gant N: Hypertensive disorders in pregnancy, *Williams Obstetrics*, 17th edition. Edited by MacDonald P, Gant N. East Norwalk, CT, Appleton-Century-Crofts, 1985, pp 525-560

Anesthesiology  
65:226-228, 1986

## Maternal Heart Rate Changes with a Plain Epidural Test Dose

PHILIP D. CARTWRIGHT, M.B., CH.B., F.F.A.R.C.S.,\* S. MÁIRE MCCARROLL, M.B., B.CH., F.F.A.R.C.S.,\*  
CHRISTINA ANTZAKA, M.D.\*

The argument as to what constitutes an effective test dose for epidural anesthesia has continued for many years. Following initial recommendations,<sup>1,2</sup> the use of test doses fell out of favor because the test doses used did not fulfill their function or were too time consuming.<sup>3</sup> Some reports highlighted the value and limitations of the technique, and that the overall complication rate was not different

in centers where test doses were or were not employed.<sup>4,5,‡</sup>

The purpose of an epidural test dose is to reveal accidental intrathecal and iv injection using a small dose of drug. Renewed enthusiasm for the use of test doses followed a statement by Moore and Batra<sup>6</sup> that "for a single test dose of a local anesthetic solution to be of value . . . it must contain 0.015 mg epinephrine and a milligram dose of the local anesthetic drug which rapidly results in evidence of spinal anesthesia." The use of epinephrine as part of the test dose has subsequently been advocated extensively.<sup>7-10</sup>

A test dose containing 15 µg epinephrine will detect intravascular injection by causing a mean rise in heart

\* Clinical Fellow.

Received from the Departments of Anaesthesia, Royal Victoria Hospital and McGill University, Montréal, Québec, Canada H3A 1A1. Accepted for publication March 24, 1986.

Address reprint requests to Dr. Cartwright: Department of Anaesthesia, Royal Victoria Hospital, 687 Pine Avenue West, Montreal, Quebec, Canada H3A 1A1.

Key words: Anesthetic techniques: epidural, obstetric. Sympathetic nervous system: epinephrine.

‡ Soni V, Peeters C, Covino B: Value and limitations of a test dose prior to epidural anesthesia. *Regional Anesthesia* 6:23-25, 1981.

rate of 32 beats/min starting 23 s after injection and lasting for 31 s.<sup>6</sup> These data refer to sedated patients for elective surgery, and the validity of the same test for laboring obstetric patients is unproven. The purpose of this study was to determine the maternal heart rate changes that occur during the 60 s following a test dose of local anesthetic without epinephrine.

## METHODS

After institutional approval, 100 women requesting epidural analgesia for pain relief during labor were studied. None was receiving any  $\beta$ -adrenergic antagonist medication. An epidural catheter was inserted at L2-3 and advanced to 4 cm in the epidural space.

The heart rate was monitored using an ECG with a digital display of heart rate. The heart rate was noted during a period of uterine quiescence while the woman was lying comfortably on her left side. This was taken as the baseline heart rate. After confirming the absence of blood and cerebrospinal fluid in the catheter, 3 ml of plain 0.5% bupivacaine was injected through the catheter at the rate of 1.0 ml/s. This test dose is the same volume as that containing 15  $\mu$ g of 1:200,000 epinephrine and the 15 mg bupivacaine will indicate an accidental intrathecal injection. The maximum change in heart rate from the baseline was noted over the following 60 s. This is the same time period that would reveal an iv epinephrine response.<sup>6</sup> If a uterine contraction occurred during this period, this was also recorded.

If there was no evidence of intrathecal or iv placement of the catheter, the epidural procedure was then managed in the usual way to achieve satisfactory analgesia.

## RESULTS

All 100 epidural blocks were effective. There was no evidence of accidental intrathecal injection or signs of systemic toxicity in the study. In one patient an epidural vein was entered on insertion of the catheter but after withdrawing 1 cm, no further blood could be aspirated.

The results of the maximum change in heart rate from the baseline heart rate are given in figure 1. The rate increased by more than 20 beats/min in 24 women and by more than 30 beats/min in 12 women. Figure 2 shows the heart rate changes for the 14 women who had a uterine contraction during the period of monitoring. Three of these women had heart rate increases of greater than 30 beats/min.

There was poor correlation between the values of maximum change in heart rate and baseline heart rate ( $r = -0.37$ ).

## DISCUSSION

A diagnostic test should have its specificity and sensitivity defined. The incidence of the condition tested and

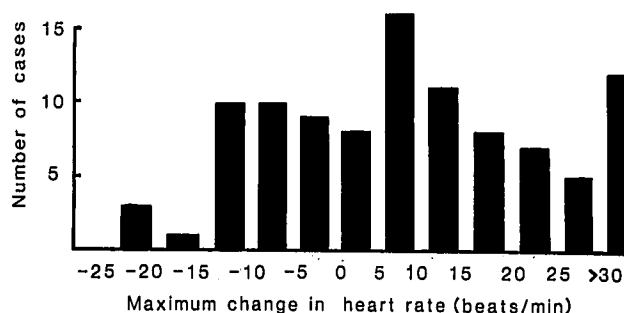

FIG. 1. The maximum change in heart rate from the baseline heart rate for the 100 women.

its severity will modify what magnitude of sensitivity and specificity one is willing to accept. In the example of the epidural test dose for accidental iv injection, if the incidence of the complication is low, then the test should have a high specificity (or low rate of false positives) to be clinically useful.

In sedated surgical patients, a mean increase in heart rate of approximately 30 beats/min occurs after 15  $\mu$ g epinephrine is given iv.<sup>6</sup> Assuming a normal distribution for heart rate changes, an increase of at least 30 beats/min will occur in 50% of patients, *i.e.*, the test has a sensitivity of 50%. The sensitivity of the epinephrine test dose in obstetrics is unknown, but may be different than that for general surgical cases. This study demonstrated an increase in heart rate greater than 30 beats/min following a test dose of local anesthetic without epinephrine in 12% of cases. If this were interpreted as an iv placement of the catheter, it would mean a  $\beta$ -error or false positive rate of 12%, *i.e.*, a specificity for the test of 88%.

The incidence of accidental iv injection during epidural anesthesia is quoted at between 0.01% and 0.2%.<sup>4,11-13</sup> Taking the highest incidence of 0.2% and a false positive rate of 12%, a rise of 30 beats/min or more in heart rate is likely to be associated with intravascular placement of the catheter only once in 120 cases (table 1), and still miss 50% of intravascular injections. Thus, the acceptance of the epinephrine test dose for obstetric practice would result in much unnecessary reinsertion of epidural catheters.

TABLE 1. Results of a Positive Test of 30 beats/min. Rise in Heart Rate in 1,000 Patients\*

|                 | Intravenous Injection | No Intravenous Injection |
|-----------------|-----------------------|--------------------------|
| Test positive   | 1                     | 120                      |
| Test negative   | 1                     | 878                      |
| No. of patients | 2                     | 998                      |

\* Using an incidence of intravenous injection of 0.2%, sensitivity of 50%, and specificity of 88% (current study).

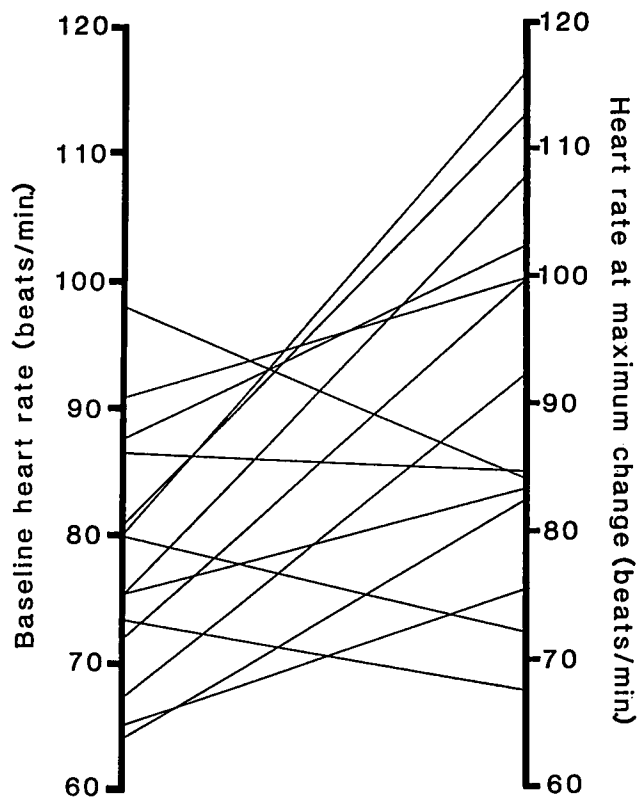

FIG. 2. The heart rate changes for the 14 women having a uterine contraction.

To reduce the criteria for a positive test to a 20 beats/min rise would increase the sensitivity of the test but in obstetric cases would lead to a  $\beta$ -error of 24%.

Of the 14 women having contractions during the measurement period, an increase in heart rate of more than 30 beats/min occurred in three cases. The tachycardia resulting from painful uterine contraction can be seen in figure 2, although this was not consistent. Nine patients had increases in heart rate of more than 30 beats/min in

the absence of uterine contractions. Thus the absence of contractions does not rule out a false positive test.

In conclusion, this study indicates the  $\beta$ -type errors that can occur in using an epidural test dose where the change in heart rate is used as the test. The study was designed using a plain local anesthetic test dose to show that maternal heart rate changes not associated with epinephrine administration do occur. Thus, the interpretation of the epinephrine test dose for obstetric anesthesia is difficult because of the poor specificity of the test.

The authors thank Dr. F. Donati of the Royal Victoria Hospital for his advice in preparing this paper.

#### REFERENCES

1. Foldes FF, Colavincenzo JW, Birch JH: Epidural anesthesia: a reappraisal. *Anesth Analg* 35:33-47, 1956
2. Moore DC: *Regional Block*. Springfield, Charles C. Thomas, 1965, p 433
3. Scott DB: Test dose in extradural analgesia. *Br J Anaesth* 50:304, 1978
4. Fortuna A: Epidural test doses. *Anesth Analg* 60:616, 1981
5. Kenepp NG, Gutsche BB: Inadvertent intravascular injections during lumbar epidural anesthesia. *ANESTHESIOLOGY* 54:172-173, 1981
6. Moore DC, Batra MS: The components of an effective test dose prior to epidural block. *ANESTHESIOLOGY* 55:693-696, 1981
7. Morison DH: Further considerations regarding the components of an effective test dose prior to epidural block. *ANESTHESIOLOGY* 57:140-141, 1982
8. Stonham J, Moss P: The optimal test dose for epidural anesthesia. *ANESTHESIOLOGY* 58:389-390, 1983
9. Nicholas AD: The optimal test dose for epidural anesthesia. *ANESTHESIOLOGY* 60:79, 1984
10. Casey WF: Epidural test doses in obstetrics. *Anaesthesia* 40:597, 1984
11. Dawkins CJM: An analysis of the complications of extradural and caudal block. *Anaesthesia* 24:554-663, 1969
12. Blundell AE, Bodell B, Andorko JE, Sweeney JC, Ansbro FP: Clinical evaluation of drugs used in obtaining lumbar epidural anesthesia. *ANESTHESIOLOGY* 16:386-393, 1955
13. Crawford JS: Some maternal complications of epidural analgesia for labour. *Anaesthesia* 40:1219-1225, 1985
